# Supplementary material for: Dichlorophosphanyl isocyanate – spectroscopy, conformation and molecular structure in the gas phase and the solid state
Source: Royal Society of Chemistry journal article supplement (doi:10.1039/c6cp05377g), 2016-01-01
Supplement: c6cp05377g1.pdf [file c6cp05377g1.pdf]

## Supporting Information

# Dichlorophosphanyl Isocyanate - Spectroscopy, Conformation and Molecular Structure in Gas Phase and Solid State

Dingqing Li,<sup>a</sup> Jan Schwabedissen,<sup>b</sup> Hans-Georg Stammler,<sup>b</sup> Norbert W. Mitzel,<sup>b,\*</sup> Helge Willner,<sup>c</sup>  
and Xiaoqing Zeng<sup>a,\*</sup>

<sup>a</sup>College of Chemistry, Chemical Engineering and Materials Science, Soochow University, 215123  
Suzhou, China. E-mail: xqzeng@suda.edu.cn

<sup>b</sup>Universität Bielefeld, Fakultät für Chemie, Lehrstuhl für Anorganische Chemie und Strukturchemie,  
Universitätsstraße 25, 33615 Bielefeld, Germany; mitzel@uni-bielefeld.de

<sup>c</sup>FB C-Anorganische Chemie, Bergische Universität Wuppertal, 42119 Wuppertal, Germany

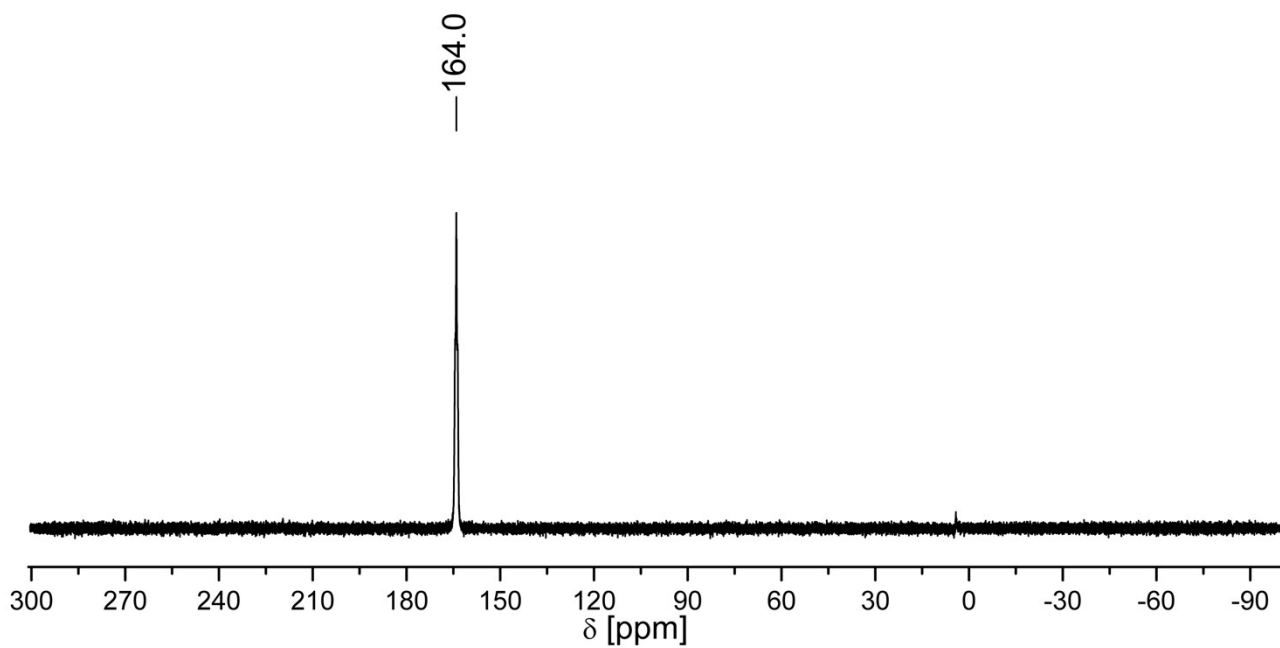

**Figure S1.**  $^{31}\text{P}$  NMR spectrum of the dichlorophosphanyl isocyanate,  $\text{Cl}_2\text{PNCO}$  (242.9 MHz,  $\text{CD}_2\text{Cl}_2$ )

**Table S1.** Cartesian coordinates for the refined structure of Cl<sub>2</sub>PNCO.

Cartesian coordinates of all atoms (Angstroms) in principal axes:

| N | At | An | Mass        | X               | Y               | Z               |
|---|----|----|-------------|-----------------|-----------------|-----------------|
| 1 | X  | -1 | 0.00000000  | 0.400925137809  | 0.000000000000  | 1.651539280505  |
| 2 | P  | 15 | 30.97376151 | 0.270874420710  | 0.000000000000  | 0.660031937627  |
| 3 | Cl | 17 | 34.96885271 | 1.274905541318  | -1.550068673110 | -0.198733286631 |
| 4 | Cl | 17 | 34.96885271 | 1.274905541318  | 1.550068673110  | -0.198733286631 |
| 5 | N  | 7  | 14.00307401 | -1.097419500806 | -0.000000000000 | -0.273296211709 |
| 6 | C  | 6  | 12.00000000 | -2.278182904887 | 0.000000000000  | -0.096810410627 |
| 7 | O  | 8  | 15.99491462 | -3.429122808464 | -0.000000000000 | -0.097281529714 |

**Table S2.** Full listing of structural parameters for the *syn* conformer of Cl<sub>2</sub>PNCO.  $r_a$ ,  $r_g$ ,  $r_e$  values are given in Å. Errors correspond to one time standard deviation. For atom numbering see Table S1.

All internal geometrical parameters.

Errors are 1.000000 times standard deviations.

| No. | Type    | i | j | k | l | $r_a$   | $r_g$   | $r_e$      | Error   |
|-----|---------|---|---|---|---|---------|---------|------------|---------|
| 1   | stretch | 1 | 2 | 0 | 0 | 1.00000 | 1.00000 | 1.00000    | 0.00000 |
| 2   | stretch | 2 | 3 | 0 | 0 | 2.04345 | 2.04501 | 2.03585    | 0.00020 |
| 3   | stretch | 2 | 4 | 0 | 0 | 2.04345 | 2.04501 | 2.03585    | 0.00020 |
| 4   | stretch | 2 | 5 | 0 | 0 | 1.66399 | 1.66734 | 1.65729    | 0.00096 |
| 5   | stretch | 5 | 6 | 0 | 0 | 1.20259 | 1.20294 | 1.19799    | 0.00033 |
| 6   | stretch | 6 | 7 | 0 | 0 | 1.15895 | 1.15929 | 1.15505    | 0.00033 |
| 7   | bend    | 1 | 2 | 3 | 0 |         |         | 110.72900  | 0.00000 |
| 8   | bend    | 1 | 2 | 4 | 0 |         |         | 110.72900  | 0.00000 |
| 9   | bend    | 1 | 2 | 5 | 0 |         |         | 131.09192  | 0.15818 |
| 10  | bend    | 3 | 2 | 4 | 0 |         |         | 99.36091   | 0.06337 |
| 11  | bend    | 3 | 2 | 5 | 0 |         |         | 100.11272  | 0.08439 |
| 12  | bend    | 4 | 2 | 5 | 0 |         |         | 100.11272  | 0.08439 |
| 13  | bend    | 2 | 5 | 6 | 0 |         |         | 137.19684  | 0.22904 |
| 14  | bend    | 5 | 6 | 7 | 0 |         |         | 171.47171  | 0.22904 |
| 15  | torsion | 1 | 2 | 5 | 6 |         |         | 180.00000  | 0.00000 |
| 16  | torsion | 3 | 2 | 5 | 6 |         |         | 129.24211  | 0.04696 |
| 17  | torsion | 4 | 2 | 5 | 6 |         |         | -129.24211 | 0.04696 |
| 18  | torsion | 2 | 5 | 6 | 7 |         |         | 180.00000  | 0.00000 |

**Table S3.** Interatomic distances ( $r_a$ ), mean square vibrational amplitudes ( $l$ ) and vibrational corrections (corr) to equilibrium geometry in the optimized GED model of the *syn* conformer.<sup>a</sup> Gu indicates grouping of amplitudes for common refinement.

| A1  | A2  | Comm( $r_a$ ) | $l$      | Corr      | A        | Gu  |
|-----|-----|---------------|----------|-----------|----------|-----|
| O7  | C6  | 1.158953      | 0.019820 | -0.003900 | 0.000000 | 101 |
| C6  | N5  | 1.202593      | 0.020506 | -0.004600 | 0.000000 | 101 |
| N5  | P2  | 1.663994      | 0.074612 | -0.006700 | 0.000000 | 102 |
| P2  | Cl3 | 2.043446      | 0.056497 | -0.007600 | 0.000000 | 103 |
| P2  | Cl4 | 2.043446      | 0.056497 | -0.007600 | 0.000000 | 103 |
| O7  | N5  | 2.350435      | 0.045200 | -0.003900 | 0.000000 | 103 |
| C6  | P2  | 2.671782      | 0.081904 | -0.008100 | 0.000000 | 104 |
| N5  | Cl3 | 2.852256      | 0.083459 | -0.010400 | 0.000000 | 105 |
| N5  | Cl4 | 2.852256      | 0.083459 | -0.010400 | 0.000000 | 105 |
| Cl3 | Cl4 | 3.117253      | 0.091108 | -0.012800 | 0.000000 | 105 |
| O7  | P2  | 3.794389      | 0.129915 | -0.008900 | 0.000000 | 106 |
| C6  | Cl3 | 3.900389      | 0.165327 | -0.012300 | 0.000000 | 106 |
| C6  | Cl4 | 3.900389      | 0.165327 | -0.012300 | 0.000000 | 106 |
| O7  | Cl3 | 4.981279      | 0.208924 | -0.013000 | 0.000000 | 107 |
| O7  | Cl4 | 4.981279      | 0.208656 | -0.013000 | 0.000000 | 107 |

<sup>a</sup> All values in Å, corrections were calculated using SHRINK program from MP2/aug-cc-pVTZ and cubic force fields. The amplitudes were refined in groups by multiplying on the scale factors (one per group), which were treated as independent parameters.

**Calculated Energies (in Hartrees) Atomic Coordinates (in Angstroms) for All Optimized Structures at the M06-2X/aug-cc-pVTZ Level of Theory.**

\*\*\*\*\*

***syn* Cl<sub>2</sub>P(O)NCO**

Zero-point correction= 0.017526  
 Thermal correction to Energy= 0.024335  
 Thermal correction to Enthalpy= 0.025279  
 Thermal correction to Gibbs Free Energy= -0.016407  
 Sum of electronic and zero-point Energies= -1429.903743  
 Sum of electronic and thermal Energies= -1429.896934  
 Sum of electronic and thermal Enthalpies= -1429.895990  
 Sum of electronic and thermal Free Energies= -1429.937676

|    |             |             |             |
|----|-------------|-------------|-------------|
| N  | -0.80341600 | 1.13197800  | 0.00000000  |
| P  | 0.82567700  | 0.67858700  | 0.00000000  |
| O  | -2.94309200 | 0.13198200  | 0.00000000  |
| C  | -1.88158700 | 0.58058700  | 0.00000000  |
| Cl | 0.82567700  | -0.66594200 | 1.57941800  |
| Cl | 0.82567700  | -0.66594200 | -1.57941800 |

***gauche* Cl<sub>2</sub>P(O)NCO**

Zero-point correction= 0.017544  
 Thermal correction to Energy= 0.024349  
 Thermal correction to Enthalpy= 0.025294  
 Thermal correction to Gibbs Free Energy= -0.016248  
 Sum of electronic and zero-point Energies= -1429.903613  
 Sum of electronic and thermal Energies= -1429.896808  
 Sum of electronic and thermal Enthalpies= -1429.895864  
 Sum of electronic and thermal Free Energies= -1429.937405

|    |             |             |             |
|----|-------------|-------------|-------------|
| N  | 1.03926100  | -0.45113500 | -0.17097100 |
| P  | -0.34878800 | -0.05435700 | 0.71022400  |
| Cl | -0.83146800 | 1.73775400  | -0.20207300 |
| Cl | -1.66983400 | -1.30366000 | -0.25231900 |
| C  | 2.23302600  | -0.30149600 | -0.11620800 |
| O  | 3.38512100  | -0.19966500 | -0.12933100 |
